# Supplementary material for: The Burden of Frailty on Mood, Cognition, Quality of Life, and Level of Independence in Patients on Hemodialysis: Regina Hemodialysis Frailty Study
Source: PubMed Central journal article supplement — Can J Kidney Health Dis. 2020 May 2;7:2054358120917780. doi: 10.1177/2054358120917780 (PMC7218321; doi:10.1177/2054358120917780), 2020-05-02
Supplement: Feb_24Clean__Frailty__Supplementarymaterials_1.pdf [file Feb_24Clean__Frailty__Supplementarymaterials_1.pdf]

**Supplemental Appendix 1: Fried Frailty Index cut-offs and scoring**

| Domain                | Test                                 | Cut-off Score                                  |
|-----------------------|--------------------------------------|------------------------------------------------|
| Slowness              | 4-meter gait speed component of SPPB | >5s                                            |
| Weakness              | Handgrip Strength Test               | male $\leq$ 30 kg,<br>female $\leq$ 20kg       |
| Weight Loss           | Self-reported                        | $\geq$ 4.5 kg                                  |
| Low Physical Activity | Paffenbarger Physical Activity Index | male<383 kcals/week, female<br><270 kcals/week |
| Exhaustion            | 2 Item CES-D Questionnaire           | $\geq$ 2                                       |

CES-D: Center for Epidemiologic Studies Depression; s: second; kg: kilogram; kcal: kilocalories; each of the five domains was scored as 0 or 1 indicating the absence or presence of that component. The frailty score was calculated as the sum of the domain scores (range 0–5); frail:  $\geq$ 3 criteria present; pre-frail:1 or 2 criteria present; robust: 0 criteria present.

**Supplemental Appendix 2: Paffenbarger Physical Activity Index**

1. Over the past 7 days, how often did you take a walk outside your home or yard for any reason? For example for fun or exercise, walking to work, walking the dog etc?

|           |                          |                             |                         |
|-----------|--------------------------|-----------------------------|-------------------------|
| (0) never | (1) seldom<br>(1-2 days) | (2) sometimes<br>(3-4 days) | (3) often<br>(5-7 days) |
|-----------|--------------------------|-----------------------------|-------------------------|

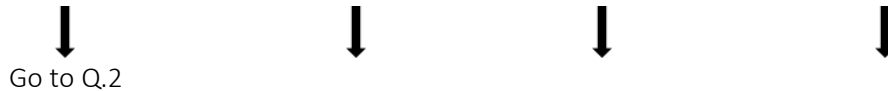

|                                                                                     |                             |
|-------------------------------------------------------------------------------------|-----------------------------|
| 1a. On average, how many hours per day did you spend walking <u>on these days</u> ? |                             |
| (1) less than 1 hour                                                                | (2) 1 but less than 2 hours |
| (3) 2-4 hours                                                                       | (4) more than 4 hours       |

b) What was the total distance (kms/miles/blocks) that you walked in the past 7 days?  
(1 mile = 12 blocks: 1km = 0.625miles).

Total number of blocks walked in the past week ....., or km....., or miles....

- (1) Less than 1 mile
- (2) One but less than 2 miles
- (3) Two to 4 miles
- (4) More than 4 miles

2. How many flights of stairs did you climb up in the past 7 days? (One flight= 10 steps)

Total number of steps climbed in the past week....., or flights of steps.....

- (1) Less than 1 flight
- (2) One but less than 2 flights
- (3) Two to 4 flights
- (4) More than 4 flights

3. Over the past 7 days, how often did you engage in **light** sport or recreational activities such as 'light' cycling on an exercise bike, lawn bowls, bowling, water aerobics, golf with a cart, yoga, tai chi, fishing from a boat or pier or other similar activities?

|           |                          |                             |                         |
|-----------|--------------------------|-----------------------------|-------------------------|
| (0) never | (1) seldom<br>(1-2 days) | (2) sometimes<br>(3-4 days) | (3) often<br>(5-7 days) |
|-----------|--------------------------|-----------------------------|-------------------------|

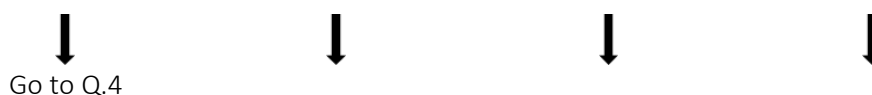

|                                                                                                                                                                                                                                                                                                                                                 |
|-------------------------------------------------------------------------------------------------------------------------------------------------------------------------------------------------------------------------------------------------------------------------------------------------------------------------------------------------|
| <p>3a. What were these activities?<br/> .....</p> <p>3b. On average, how many hours per day did you engage in these light sport or recreational activities <u>on these days</u>?</p> <p>(1) less than 1 hour                      (2) 1 but less than 2 hours<br/> (3) 2-4 hours                                      (4) more than 4 hours</p> |
|-------------------------------------------------------------------------------------------------------------------------------------------------------------------------------------------------------------------------------------------------------------------------------------------------------------------------------------------------|

4. Over the past 7 days, how often did you engage in **moderate** sport or recreational activities such as double tennis, ballroom dancing, golf without a cart, softball or other similar activities?

|           |                          |                             |                         |
|-----------|--------------------------|-----------------------------|-------------------------|
| (0) never | (1) seldom<br>(1-2 days) | (2) sometimes<br>(3-4 days) | (3) often<br>(5-7 days) |
|-----------|--------------------------|-----------------------------|-------------------------|



Go to Q.5

|                                                                                                                                                                                                                                                                                                                                                      |
|------------------------------------------------------------------------------------------------------------------------------------------------------------------------------------------------------------------------------------------------------------------------------------------------------------------------------------------------------|
| <p>4a. What were these activities?<br/> .....</p> <p>4b. On average, how many hours per day did you engage in these moderate sport or recreational activities <u>on these days</u>?</p> <p>(1) less than 1 hour                      (2) 1 but less than 2 hours<br/> (3) 2 - 4 hours                                      (4) more than 4 hours</p> |
|------------------------------------------------------------------------------------------------------------------------------------------------------------------------------------------------------------------------------------------------------------------------------------------------------------------------------------------------------|

5. Over the past 7 days, how often did you engage in **strenuous** sport and recreational activities such as jogging, swimming, cycling, single tennis, aerobic dance, skiing (downhill or cross country) or other similar activities?

|           |                          |                             |                         |
|-----------|--------------------------|-----------------------------|-------------------------|
| (0) never | (1) seldom<br>(1-2 days) | (2) sometimes<br>(3-4 days) | (3) often<br>(5-7 days) |
|-----------|--------------------------|-----------------------------|-------------------------|



Go to Q.6

|                                                                                                                                                                                                                                                                                                                                                      |
|------------------------------------------------------------------------------------------------------------------------------------------------------------------------------------------------------------------------------------------------------------------------------------------------------------------------------------------------------|
| <p>5a. What were these activities?<br/> .....</p> <p>5b. On average, how many hours per day did you engage in these moderate sport or recreational activities <u>on these days</u>?</p> <p>(1) less than 1 hour                      (2) 1 but less than 2 hours<br/> (3) 2 - 4 hours                                      (4) more than 4 hours</p> |
|------------------------------------------------------------------------------------------------------------------------------------------------------------------------------------------------------------------------------------------------------------------------------------------------------------------------------------------------------|

**Paffenbarger Score:**

|                                                               |   |                    |       |           |
|---------------------------------------------------------------|---|--------------------|-------|-----------|
| Blocks walked                                                 | X | 8 kcal /<br>block  | =     | kcal      |
| Flights climbed                                               | X | 4 kcal /<br>flight | =     | kcal      |
| Minutes light<br>sport/recreation                             | X | 5 kcal / min       | =     | kcal      |
| Minutes<br>Moderate sport<br>recreation or<br>muscle strength | X | 7.5 kcal /<br>min  | =     | kcal      |
| Minutes heavy<br>sport/recreation                             | X | 10 kcal /<br>min   | =     | kcal      |
|                                                               |   |                    | Total | kcal/week |

**Supplemental Appendix 3: 2 Item CES–D Questionnaire**

| 2 Item CES–D Questionnaire                                                                                                                                                                                                                                                        | Scoring                             |
|-----------------------------------------------------------------------------------------------------------------------------------------------------------------------------------------------------------------------------------------------------------------------------------|-------------------------------------|
| <p>How often in the last week did you feel that everything was an effort?</p> <p>Rarely or none of the time (&lt;1 day)</p> <p>Some or a little of the time (1–2 days)</p> <p>Occasionally or a moderate amount of time (3–4 days)</p> <p>Most or all of the time (5–7 days)</p>  | <p>0</p> <p>1</p> <p>2</p> <p>3</p> |
| <p>How often in the last week did you feel that you could not “get going”?</p> <p>Rarely or none of the time (&lt;1 day)</p> <p>Some or a little of the time (1–2 days)</p> <p>Occasionally or a moderate amount of time (3–4 days)</p> <p>Most or all of the time (5–7 days)</p> | <p>0</p> <p>1</p> <p>2</p> <p>3</p> |

CES-D: Center for Epidemiologic Studies Depression; score of 2 or more to either of questions defined as exhaustion.

Supplemental Appendix 4: Montreal Cognitive Assessment

**MONTREAL COGNITIVE ASSESSMENT (MOCA)**  
Version 7.1 Original Version

| VISUOSPATIAL / EXECUTIVE |     |                                                                                                                                                                  |                                            |                                                                                                                            |         |                           |          |                               |           |        |
|--------------------------|-----|------------------------------------------------------------------------------------------------------------------------------------------------------------------|--------------------------------------------|----------------------------------------------------------------------------------------------------------------------------|---------|---------------------------|----------|-------------------------------|-----------|--------|
|                          |     | Copy cube                                                                                                                                                        | Draw CLOCK (Ten past eleven)<br>(3 points) |                                                                                                                            |         |                           |          |                               |           |        |
| [ ]                      | [ ] | [ ]                                                                                                                                                              | [ ]                                        | [ ]                                                                                                                        | [ ]     | [ ]                       | [ ]      | [ ]                           | [ ]       |        |
|                          |     |                                                                                                                                                                  | Contour                                    | Numbers                                                                                                                    | Hands   |                           |          |                               |           | ___/5  |
| NAMING                   |     |                                                                                                                                                                  |                                            |                                                                                                                            |         |                           |          |                               |           |        |
|                          |     |                                                                                                                                                                  |                                            |                                                                                                                            |         |                           |          |                               |           | ___/3  |
| [ ]                      | [ ] | [ ]                                                                                                                                                              |                                            |                                                                                                                            |         |                           |          |                               |           |        |
| MEMORY                   |     | Read list of words, subject must repeat them. Do 2 trials, even if 1st trial is successful. Do a recall after 5 minutes.                                         |                                            | FACE                                                                                                                       | VELVET  | CHURCH                    | DAISY    | RED                           | No points |        |
|                          |     | 1st trial                                                                                                                                                        |                                            |                                                                                                                            |         |                           |          |                               |           |        |
|                          |     | 2nd trial                                                                                                                                                        |                                            |                                                                                                                            |         |                           |          |                               |           |        |
| ATTENTION                |     | Read list of digits (1 digit/ sec.). Subject has to repeat them in the forward order [ ] 2 1 8 5 4<br>Subject has to repeat them in the backward order [ ] 7 4 2 |                                            |                                                                                                                            |         |                           |          |                               |           | ___/2  |
|                          |     | Read list of letters. The subject must tap with his hand at each letter A. No points if ≥ 2 errors                                                               |                                            | [ ] FBACMNAAJKLBAFAKDEAAAJAMOF AAB                                                                                         |         |                           |          |                               |           | ___/1  |
|                          |     | Serial 7 subtraction starting at 100 [ ] 93 [ ] 86 [ ] 79 [ ] 72 [ ] 65                                                                                          |                                            | 4 or 5 correct subtractions: <b>3 pts</b> , 2 or 3 correct: <b>2 pts</b> , 1 correct: <b>1 pt</b> , 0 correct: <b>0 pt</b> |         |                           |          |                               |           | ___/3  |
| LANGUAGE                 |     | Repeat : I only know that John is the one to help today. [ ]<br>The cat always hid under the couch when dogs were in the room. [ ]                               |                                            |                                                                                                                            |         |                           |          |                               |           | ___/2  |
|                          |     | Fluency / Name maximum number of words in one minute that begin with the letter F [ ] _____ (N ≥ 11 words)                                                       |                                            |                                                                                                                            |         |                           |          |                               |           | ___/1  |
| ABSTRACTION              |     | Similarity between e.g. banana - orange = fruit [ ] train - bicycle [ ] watch - ruler                                                                            |                                            |                                                                                                                            |         |                           |          |                               |           | ___/2  |
| DELAYED RECALL           |     | Has to recall words WITH NO CUE                                                                                                                                  | FACE                                       | VELVET                                                                                                                     | CHURCH  | DAISY                     | RED      | Points for UNCUED recall only |           | ___/5  |
|                          |     | Category cue                                                                                                                                                     | [ ]                                        | [ ]                                                                                                                        | [ ]     | [ ]                       | [ ]      |                               |           |        |
|                          |     | Multiple choice cue                                                                                                                                              |                                            |                                                                                                                            |         |                           |          |                               |           |        |
| Optional                 |     |                                                                                                                                                                  |                                            |                                                                                                                            |         |                           |          |                               |           |        |
| ORIENTATION              |     | [ ] Date                                                                                                                                                         | [ ] Month                                  | [ ] Year                                                                                                                   | [ ] Day | [ ] Place                 | [ ] City |                               |           | ___/6  |
| © Z.Nasreddine MD        |     | www.mocatest.org                                                                                                                                                 |                                            | TOTAL                                                                                                                      |         |                           |          |                               |           | ___/30 |
| Administered by: _____   |     |                                                                                                                                                                  |                                            |                                                                                                                            |         | Add 1 point if ≤ 12 yredu |          |                               |           |        |

**Supplemental Appendix 5: 5-Item GDS**

| 5 Item GDS                                                                |               |
|---------------------------------------------------------------------------|---------------|
| Are you basically satisfied with your life?                               | Yes <b>No</b> |
| Do you often get bored?                                                   | <b>Yes</b> No |
| Do you often feel helpless?                                               | <b>Yes</b> No |
| Do you prefer to stay at home rather than going out and doing new things? | <b>Yes</b> No |
| Do you feel pretty worthless the way you are now?                         | <b>Yes</b> No |

GDS: Geriatric Depression Scale; each bold answer was scored as 1; the depression score was calculated as the sum of the scores (range 0–5); depressive symptoms:  $\geq 2$

**Supplemental Appendix 6: EQ-5D-3L**

**EQ-5D (UK English version)**

By placing a tick in one box in each group below, please indicate which statements best describe your own health state today.

**Mobility**

- I have no problems in walking about
- I have some problems in walking about
- I am confined to bed

**Self-Care**

- I have no problems with self-care
- I have some problems washing or dressing myself
- I am unable to wash or dress myself

**Usual Activities** (e.g. work, study, housework, family or leisure activities)

- I have no problems with performing my usual activities
- I have some problems with performing my usual activities
- I am unable to perform my usual activities

**Pain/Discomfort**

- I have no pain or discomfort
- I have moderate pain or discomfort
- I have extreme pain or discomfort

**Anxiety/Depression**

- I am not anxious or depressed
- I am moderately anxious or depressed
- I am extremely anxious or depressed



## Supplemental Appendix 7: EQ-VAS

To help people say how good or bad a health state is, we have drawn a scale (rather like a thermometer) on which the best state you can imagine is marked 100 and the worst state you can imagine is marked 0.

We would like you to indicate on this scale how good or bad your own health is today, in your opinion. Please do this by drawing a line from the box below to whichever point on the scale indicates how good or bad your health state is today.

**Your own  
health state  
today**

Best  
imaginable  
health state

100

95

90

85

80

75

70

65

60

55

50

45

40

35

30

25

20

15

10

5

0

0

1

2

3

4

5

6

7

8

9

10

11

12

13

14

15

16

17

18

19

20

21

22

23

24

25

26

27

28

29

30

31

32

33

34

35

36

37

38

39

40

41

42

43

44

45

46

47

48

49

50

51

52

53

54

55

56

57

58

59

60

61

62

63

64

65

66

67

68

69

70

71

72

73

74

75

76

77

78

79

80

81

82

83

84

85

86

87

88

89

90

91

92

93

94

95

96

97

98

99

100

Worst  
imaginable  
health state

Supplemental Table 1: Change in frailty status

| Baseline Characteristics        | Improved<br>n= 5<br>Mean ± SD; Median (IQR);<br>n (%) | Worsened<br>n=7<br>Mean ± SD; Median (IQR);<br>n (%) |        |
|---------------------------------|-------------------------------------------------------|------------------------------------------------------|--------|
| Age (years)                     | 56.6 ± 12.5                                           | 64.7 ± 12.4                                          | p=0.16 |
| < 65 years                      | 3 (60.0%)                                             | 4 (57.1%)                                            |        |
| ≥ 65 years                      | 2 (40.0%)                                             | 3 (42.9%)                                            |        |
| Gender (female)                 | 1 (20.0%)                                             | 3 (42.9%)                                            | p=0.58 |
| Ethnicity                       |                                                       |                                                      |        |
| Caucasian                       | 3 (60.0%)                                             | 6 (85.7%)                                            | p=0.15 |
| Aboriginal                      | -                                                     | 1 (14.3%)                                            |        |
| Asian                           | 2 (40.0%)                                             | -                                                    |        |
| Education                       |                                                       |                                                      |        |
| ≤12 years of education          | 3 (60.0%)                                             | 2 (28.6%)                                            | p=0.56 |
| >12 years of education          | 2 (40.0%)                                             | 5 (71.4%)                                            |        |
| Weight (kg)                     | 90.9 ± 26.8                                           | 81.7 ± 24.4                                          | p=0.68 |
| Height (cm)                     | 168.9 ± 9.4                                           | 169.2 ± 8.9                                          | p=0.46 |
| BMI (kg/m <sup>2</sup> )        | 29.3 ± 7.26                                           | 29.5 ± 7.5                                           | p=0.94 |
| Systolic Blood Pressure (mmHg)  | 135.3 ± 25.1                                          | 136.1 ± 29.4                                         | p=0.37 |
| Diastolic Blood Pressure (mmHg) | 73.0 ± 13.6                                           | 72.3 ± 17.0                                          | P=0.81 |
| Comorbidities                   |                                                       |                                                      |        |
| Diabetes I or II                | 3 (60.0%)                                             | 4 (57.1%)                                            | p=1.00 |
| Peripheral Vascular Diseases    | 1 (20.0%)                                             | 0 (0.0%)                                             | p=0.42 |
| Hypertension                    | 5 (100.0%)                                            | 6 (85.7%)                                            | p=1.00 |
| Dyslipidemia                    | 0 (0%)                                                | 0 (0%)                                               | -      |
| Vintage of Dialysis (months)    | 9.0 (4–20)                                            | 68 (37.5–135.5)                                      | p=0.01 |
| Components of Frailty           |                                                       |                                                      |        |
| Slowness                        | 5 (100.0%)                                            | 6 (85.7%)                                            | p=1.00 |
| Weakness                        | 4 (80.0%)                                             | 5 (71.4%)                                            | p=1.00 |
| Weight Loss ≥ 4.5kg             | 1 (20.0%)                                             | 1 (14.3%)                                            | p=1.00 |
| Low Physical Activity           | 3 (60.0%)                                             | 4 (57.1%)                                            | p=1.00 |
| Exhaustion                      | 3 (60.0%)                                             | 4 (57.1%)                                            | p=1.00 |

IQR: Interquartile Range; SD: Standard Deviation. Baseline characteristics were compared between the two groups using Mann-Whitney U test for continuous variables and Fisher's Exact test for categorical variables.

**Supplemental Table 2:** Comparison of baseline characteristics between frail and not-frail groups

| Baseline Characteristics        | Frail<br>Mean $\pm$ SD; Median (IQR);<br>n (%) | Not- Frail<br>Mean $\pm$ SD; Median (IQR);<br>n (%) | P value |
|---------------------------------|------------------------------------------------|-----------------------------------------------------|---------|
| Age (years)                     | 64.8 $\pm$ 13.9                                | 59.4 $\pm$ 17.3                                     | p=0.15  |
| Gender (female)                 | 33 (50.0%)                                     | 9 (29.0%)                                           | p=0.08  |
| Ethnicity                       |                                                |                                                     | p=0.66  |
| Caucasian                       | 47 (71.2%)                                     | 25 (80.6%)                                          |         |
| Aboriginal                      | 15 (22.7%)                                     | 4 (12.9%)                                           |         |
| Asian                           | 4 (6.1%)                                       | 2 (6.5%)                                            |         |
| Education                       |                                                |                                                     | p=0.01  |
| $\leq$ 12 years of education    | 18 (27.3%)                                     | 17 (54.8%)                                          |         |
| $>$ 12 years of education       | 48 (72.7%)                                     | 14 (45.2%)                                          |         |
| Weight (kg)                     | 82.0 $\pm$ 24.1                                | 86.7 $\pm$ 22.4                                     | p=0.19  |
| Height (cm)                     | 168.0 $\pm$ 9.0                                | 169.2 $\pm$ 9.5                                     | p=0.53  |
| BMI (kg/m <sup>2</sup> )        | 28.9 $\pm$ 7.0                                 | 30.4 $\pm$ 8.1                                      | p=0.40  |
| Systolic Blood Pressure (mmHg)  | 134.1 $\pm$ 26.9                               | 138.7 $\pm$ 21.9                                    | P=0.39  |
| Diastolic Blood Pressure (mmHg) | 71.8 $\pm$ 14.4                                | 76.1 $\pm$ 11.3                                     | p=0.14  |
| Comorbidities                   |                                                |                                                     |         |
| Diabetes I or II                | 31 (47.0%)                                     | 11 (35.5%)                                          | p=0.22  |
| Peripheral Vascular Diseases    | 5 (7.6%)                                       | 2 (6.5%)                                            | p=0.73  |
| Hypertension                    | 45 (68.2%)                                     | 21 (67.7%)                                          | p=0.48  |
| Dyslipidemia                    | 7 (10.6%)                                      | 8 (25.8%)                                           | p=0.15  |
| Vintage of Dialysis (months)    | 37.0 (16–75.75)                                | 29 (9.5–58.5)                                       | p=0.40  |

IQR: Interquartile Range; SD: Standard Deviation. Baseline characteristics were compared between the two groups using Mann-Whitney U test for continuous variables and Fisher’s Exact test for categorical variables.

**Supplemental Table 3:** Comparison of characteristics between baseline and 1– year follow–up

IQR: Interquartile Range; MoCA: Montreal Cognitive Assessment; GDS: Geriatric Depression Scale; EQ-5D-3L: EuroQoL-5 Dimensions-3 Levels; EQ-VAS: EuroQoL Visual Analog Scale.

|                                          | Baseline            | 1-Year Follow-Up |                                |
|------------------------------------------|---------------------|------------------|--------------------------------|
| Characteristics                          | Median (IQR); n (%) |                  | P value for Paired Differences |
| <b>Frail</b>                             | 42 (64.6%)          | 44 (67.7%)       | p=0.774; n=65                  |
| <b>Fried Frailty Domains</b>             |                     |                  |                                |
| <b>Slowness</b>                          | 43 (66.2%)          | 39 (60%)         | p=0.481; n=65                  |
| <b>Weakness</b>                          | 45 (69.2%)          | 50 (76.9%)       | p=0.18; n=65                   |
| <b>Weight Loss</b>                       | 9 (13.8%)           | 12 (18.5%)       | p=0.549; n=65                  |
| <b>Low Physical Activity</b>             | 52 (80%)            | 44 (67.7%)       | p=0.115; n=65                  |
| <b>Exhaustion</b>                        | 26 (40%)            | 34 (52.3%)       | p=0.152; n=65                  |
| <b>Cognitive Impaired</b>                | 38 (61.3%)          | 40 (64.5%)       | p=0.832; n=62                  |
| <b>MoCA Score (<math>\leq 24</math>)</b> | 23 (18–26)          | 24 (20.75–25.25) | p=0.159; n=62                  |
| <b>Depressive Symptoms</b>               | 33 (52.4%)          | 30 (47.6%)       | p=0.629; n=63                  |
| <b>GDS Score (<math>\geq 2</math>)</b>   | 2 (1–4)             | 1 (0–3)          | p=0.039; n=63                  |
| <b>EQ-5D-3L Dimensions</b>               |                     |                  |                                |
| <b>Mobility Problems</b>                 | 44 (67.7%)          | 54 (83.1%)       | p=0.02; n=65                   |
| <b>Self-Care Problems</b>                | 4 (6.2%)            | 12 (18.5%)       | p=0.02; n=65                   |
| <b>Daily Activities Problems</b>         | 35 (53.8%)          | 38 (58.5%)       | p=0.70 ; n=65                  |
| <b>Pain/ Discomfort Problems</b>         | 41 (63.1%)          | 41 (63.1%)       | p>0.999; n=65                  |
| <b>Anxiety/ Depression Problems</b>      | 20 (30.8%)          | 24 (36.9%)       | p=0.52; n=65                   |
| <b>EQ-5D Utility Score</b>               | 0.81(0.7–0.85)      | 0.77(0.69–0.84)  | p=0.037; n=65                  |
| <b>EQ-VAS</b>                            | 60 (50–80)          | 50(45–80)        | p=0.772; n=63                  |
| <b>Level of Dependence</b>               |                     |                  | n=65                           |
| <b>Independent</b>                       | 53 (81.5%)          | 41 (63.1%)       |                                |
| <b>Independent with Support</b>          | 11 (16.9%)          | 20 (30.8%)       |                                |
| <b>Home Care</b>                         | 1 (1.5%)            | 2 (3.1%)         |                                |
| <b>Long Term Care Home</b>               | 0 (0%)              | 2 (3.1%)         |                                |

Frailty was measured using 5-Item Fried Frailty Criteria, frail:  $\geq 3$  criteria present, non-frail:  $< 3$ , non-frail was considered the combination of robust and pre-frail. Cognitive function was measured using the MoCA: the highest possible score is 30, cognitive impaired: MoCA score  $\leq 24$ . Depressive symptoms were identified using 5-Item GDS questionnaire: the worst possible score is 5, depressed: GDS score  $\geq 2$ ; Quality of life was measured using EQ-5D; problems in each dimension was considered the

combination of moderate and extreme problems. EQ-5D utility score: 0 means death, and 1 is the best health state; EQ-VAS: 0 is the worst imaginable health state, and 100 is the best imaginable health state.
